# Supplementary material
Source: PubMed Central journal article supplement (PMC5383578)
Supplement: mmc1.pdf [file mmc1.pdf]

YMTHE, Volume 25

## **Supplemental Information**

### **Long Noncoding RNA LINC00673 Is Activated by SP1 and Exerts Oncogenic Properties by Interacting with LSD1 and EZH2 in Gastric Cancer**

**Mingde Huang, Jiakai Hou, Yunfei Wang, Min Xie, Chenchen Wei, Fengqi Nie, Zhaoxia Wang, and Ming Sun**

**Supplementary Table1.** Primers, siRNAs and shRNAs sequence

---

**Primers for qPCR**

---

|                       |                           |
|-----------------------|---------------------------|
| GAPDH F               | GGGAGCCAAAAGGGTCAT        |
| GAPDH R               | GAGTCCTTCCACGATACCAA      |
| LINC00673 F           | TACCACACCCTTTCTTGCCC      |
| LINC00673 R           | ACACTGGCCTCTTTACACGG      |
| LINC00673 P1 F        | CATAGCCTGGGACTTGAA        |
| LINC00673 P1 R        | CATGAGAATCGCTTGGAC        |
| LINC00673 P2 F        | GGAATGCCCTGTCTATCT        |
| LINC00673 P2 R        | GGCATGAGAATCGCTTGG        |
| CADM4 F               | CTAGTGGGCATGGTCTGGTG      |
| CADM4 R               | TCCCTGTTTCATCCAAGCCAC     |
| CLDN6 F               | CATGCCATCATCCGGGACTT      |
| CLDN6 R               | GCAGGGGCAGATGTTGAGTA      |
| EMP3 F                | TCTACACCATGCGACGAGGA      |
| EMP3 R                | GGGCGAAGCAGTATCCGAAG      |
| GADD45GIP1 F          | GTGGTCCCCGGTTCGTTATG      |
| GADD45GIP1 R          | CAGTATCCAGTCCCCGCCATC     |
| INHBE F               | TCTTGACACAGCAGGACAC       |
| INHBE R               | CAGTATCCAGTCCCCGCCATC     |
| KIF14 F               | CGGGATTGACGGCAGTAAGA      |
| KIF14 R               | ACTGGGTGTGCATTCTCTG       |
| S100P F               | AGTTCATCGTGTTCGTGGCT      |
| S100P R               | CACTTTTGGAAGCCTGGGA       |
| E2F2 F                | CCAGCGCATCGCGTCTC         |
| E2F2 R                | TAGAGATCGCCGCTTGGAG       |
| CRIP2 F               | GTGCGACAAGACCGTGTACT      |
| CRIP2 R               | TCGCACTTGAGGCAGAACTT      |
| KLF2 P26-155 F        | ACGGGCTTATTGAGGTTGG       |
| KLF2 P26-155 R        | GCCTGGGTGACAGAGGAGAC      |
| KLF2 F                | AGAGGGTCTCCCTCGATGAC      |
| KLF2 R                | TCTACAAGGCATCACAAAGC      |
| LATS2 F               | ACCCCAAAGTTCGGACCTTAT     |
| LATS2 R               | CATTTGCCGGTTCACCTTCTGC    |
| <b>siRNA sequence</b> |                           |
| si-LINC00673 1#       | CAGCCGGAUACAGAGUGAAUAGUUA |
| si-LINC00673 2#       | UGUGCCUUUGUACUCAGCAAUUCUU |
| si-SP1-1              | CAGCGUUUCUGCAGCUACCUUGACU |
| si-SP1-2              | GACAGGUCAGUUGGCAGACUCUACA |

|                       |                                                                 |
|-----------------------|-----------------------------------------------------------------|
| si-EZH2-1             | AAGACTCTGAATGCAGTTGCT                                           |
| si-EZH2-2             | CGGCUUCCCAAU AACAGUATT                                          |
| si-LSD1-1             | CAACCTCTCAGAAGATGAGTATTAT                                       |
| si-LSD1-2             | CAAAGGAAACTATGTAGCTGATCTT                                       |
| si-KLF2               | CCAAGAGTTCGCATCTGAA                                             |
| si-LATS2              | CAGGTGGACTCACAATTCCAAATAT                                       |
| <b>shRNA sequence</b> |                                                                 |
| sh-LINC00673 1#       | CACCGCAGCCGGATACAGAGTGAATAGTTACGAATAACTAT<br>TCACTCTGTATCCGGCTG |
| sh-LINC00673 2#       | CACCGTGTGCCTTTGTACTCAGCAATTCTTCGAAAAGAATTG<br>CTGAGTACAAAGGCACA |

---

**Supplementary Table 2.** Correlation between LINC00673 expression and clinicopathological characteristics of gastric cancer patients (n = 73)

| <b>Characteristics</b>       | <b>Linc00673<br/>Low no.<br/>case(%)</b> | <b>Linc00673 High<br/>no.<br/>case(%)</b> | <b>P<br/>Chi-squared test<br/>P-value</b> |
|------------------------------|------------------------------------------|-------------------------------------------|-------------------------------------------|
| <b>Age(years)</b>            |                                          |                                           |                                           |
| >65                          | 18(24.7)                                 | 16(21.9)                                  | 0.352                                     |
| ≤65                          | 25(34.2)                                 | 14(19.2)                                  |                                           |
| <b>Gender</b>                |                                          |                                           |                                           |
| Male                         | 23(31.5)                                 | 19(26.0)                                  | 0.474                                     |
| Female                       | 20(27.4)                                 | 11(15.1)                                  |                                           |
| <b>Histologic</b>            |                                          |                                           |                                           |
| Well                         | 20(27.4)                                 | 4(5.8)                                    | 0.026*                                    |
| Moderately                   | 15(20.5)                                 | 15(20.5)                                  |                                           |
| Poorly                       | 7(9.6)                                   | 9(12.3)                                   |                                           |
| Undifferentiated             | 1(1.4)                                   | 2(2.7)                                    |                                           |
| <b>TNM Stage</b>             |                                          |                                           |                                           |
| I                            | 7(9.6)                                   | 0(0.0)                                    | 0.024*                                    |
| II                           | 18(24.7)                                 | 10(13.7)                                  |                                           |
| III                          | 16(21.9)                                 | 14(19.2)                                  |                                           |
| IV                           | 2(2.7)                                   | 6(8.2)                                    |                                           |
| <b>Tumor size</b>            |                                          |                                           |                                           |
| ≤5cm                         | 28(38.4)                                 | 11(15.1)                                  | 0.019*                                    |
| >5cm                         | 15(20.5)                                 | 19(26.0)                                  |                                           |
| <b>Lymph node metastasis</b> |                                          |                                           |                                           |
| Negative                     | 19(26.0)                                 | 6(8.2)                                    | 0.045*                                    |
| Positive                     | 24(32.9)                                 | 24(32.9)                                  |                                           |
| <b>Location</b>              |                                          |                                           |                                           |
| Distal                       | 17(23.3)                                 | 14(19.2)                                  | 0.741                                     |
| Middle                       | 15(20.5)                                 | 8(11.0)                                   |                                           |
| Proximal                     | 11(15.1)                                 | 8(11.0)                                   |                                           |

**Supplementary Table 3.** Univariate and multivariate analysis of OS in gastric cancer patients (n=73)

| Variables                           | Univariate analysis |             |             | Multivariate analysis |                 |         |
|-------------------------------------|---------------------|-------------|-------------|-----------------------|-----------------|---------|
|                                     | HR                  | 95% CI      | p value     | HR                    | 95% CI          | p value |
| Age                                 | 0.85<br>5           | 0.435-1.683 | 0.651       |                       |                 |         |
| Gender                              | 0.83<br>6           | 0.436-1.605 | 0.591       |                       |                 |         |
| Location                            | 1.23<br>2           | 0.779-1.950 | 0.372       |                       |                 |         |
| Tumor size                          | 1.61<br>8           | 0.846-3.095 | 0.146       |                       |                 |         |
| Histologic                          | 1.74<br>2           | 1.165-2.606 | 0.007*      | 1.39<br>5             | 0.903-2.15<br>6 | 0.134   |
| TNM stage                           | 1.69<br>5           | 1.087-2.643 | 0.020*      | 1.21<br>7             | 0.725-2.04<br>3 | 0.458   |
| Lymph node metastasis (No vs .Yes)  | 3.76<br>6           | 1.539-9.217 | 0.004*      | 2.55<br>6             | 1.014-6.44<br>4 | 0.047*  |
| LINC00673 expression (High vs. Low) | 4.01<br>0           | 2.017-7.969 | <0.001<br>* | 2.38<br>1             | 1.121-5.05<br>6 | 0.024*  |

HR, hazard ratio; 95 % CI, 95 % confidence interval, \* Overall P < 0.05.

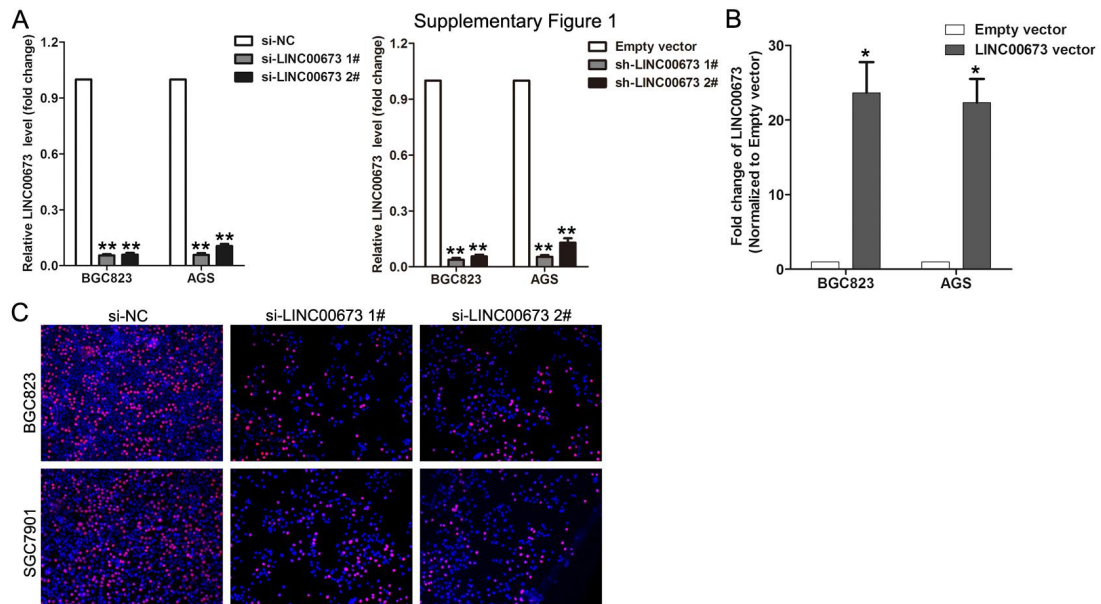

**Figure S1. (a)** qRT-PCR analysis of LINC00673 expression in BGC823 and AGS cells after transfection with si-DUXAP8 or sh-DUXAP8. **(b)** qRT-PCR analysis of LINC00673 expression in BGC823 and AGS cells after transfection with the LINC00673 expression vector or an empty vector. **(c)** Cell proliferation of BGC823 and AGS was evaluated 48 h after transfection with LINC00673 or NC siRNA using EdU-incorporation assays. Red: EdU staining of proliferating cells; blue: DAPI staining of the cell nuclei. The mean values and standard errors were calculated from triplicates of a representative experiment. \*P<0.05, \*\*P<0.01.

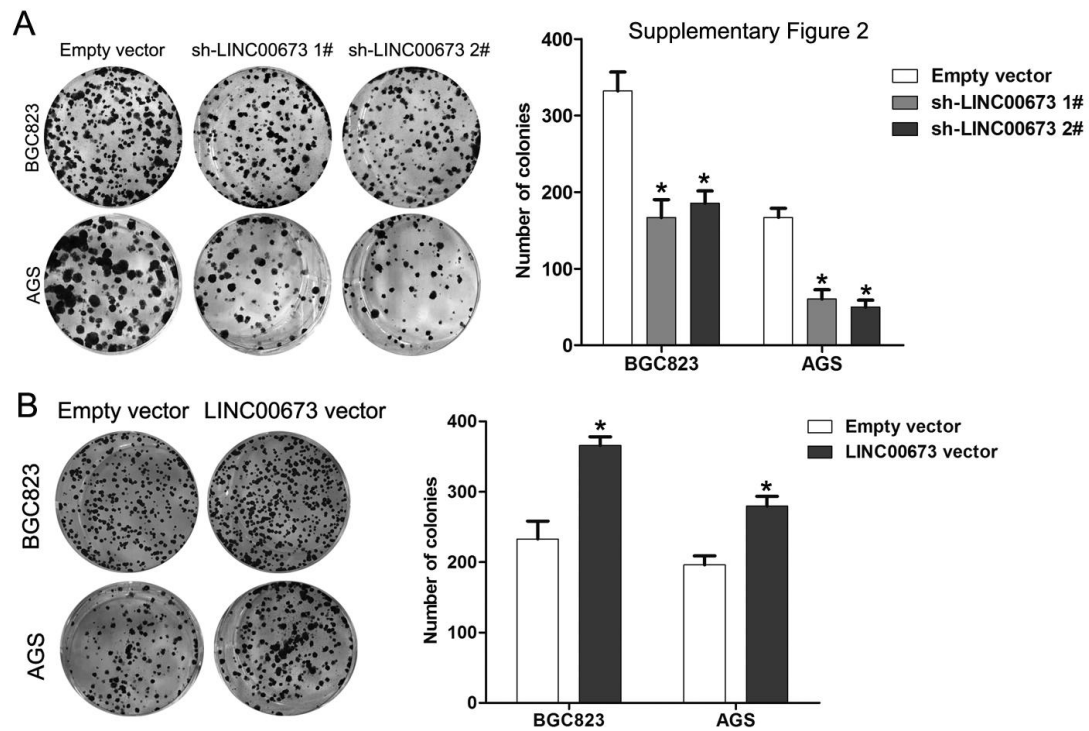

**Figure S2. (a)** Colony formation analysis of BGC823 and AGS cell proliferation after transfection with sh-LIN00673 or an empty vector. **(b)** Colony formation analysis of BGC823 and AGS cell proliferation after transfection with the LINC0673 expression vector or an empty vector. The mean values and standard errors were calculated from triplicates of a representative experiment.

\*P<0.05.

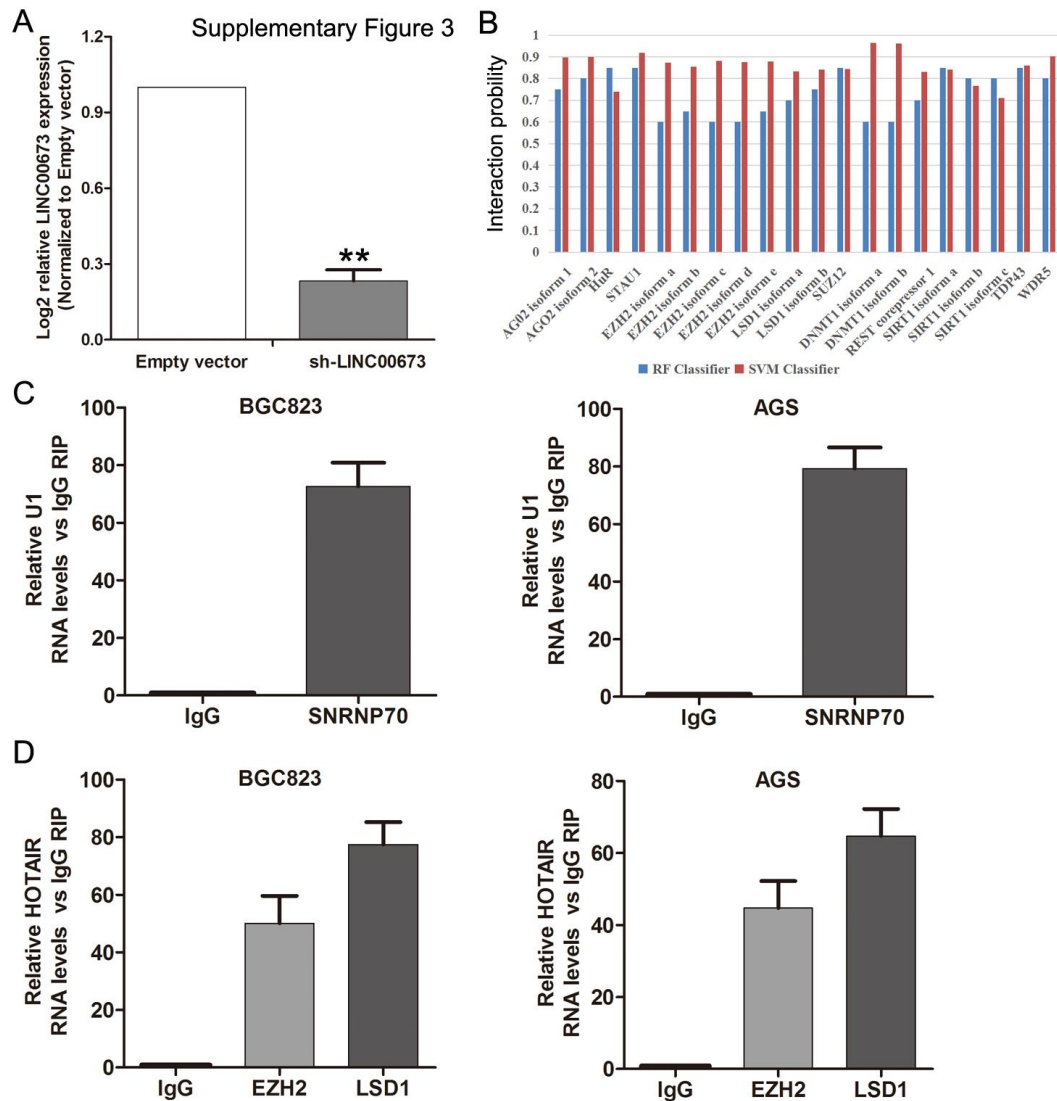

**Supplementary Figure 3. (a)** qRT-PCR analysis of LINC00673 expression in mouse tumor tissues from sh-LINC00673 or the control group. **(b)** Prediction of the interaction probability between LINC00673 and RNA binding proteins using the online database at <http://pridb.gdcb.iastate.edu/RPISeq/>. **(c)** U1 RNA levels in SNRNP70 immunoprecipitates were determined by qRT-PCR. The expression levels for U1 RNA are presented as fold enrichment values relative to the IgG immunoprecipitates. **(d)** HOTAIR RNA levels in EZH2 and LSD1 immunoprecipitates were determined by qRT-PCR. Expression levels for HOTAIR are presented as fold enrichment values relative to the IgG immunoprecipitates. The mean values and standard errors were calculated from triplicates of a representative experiment. \*\*P<0.01.



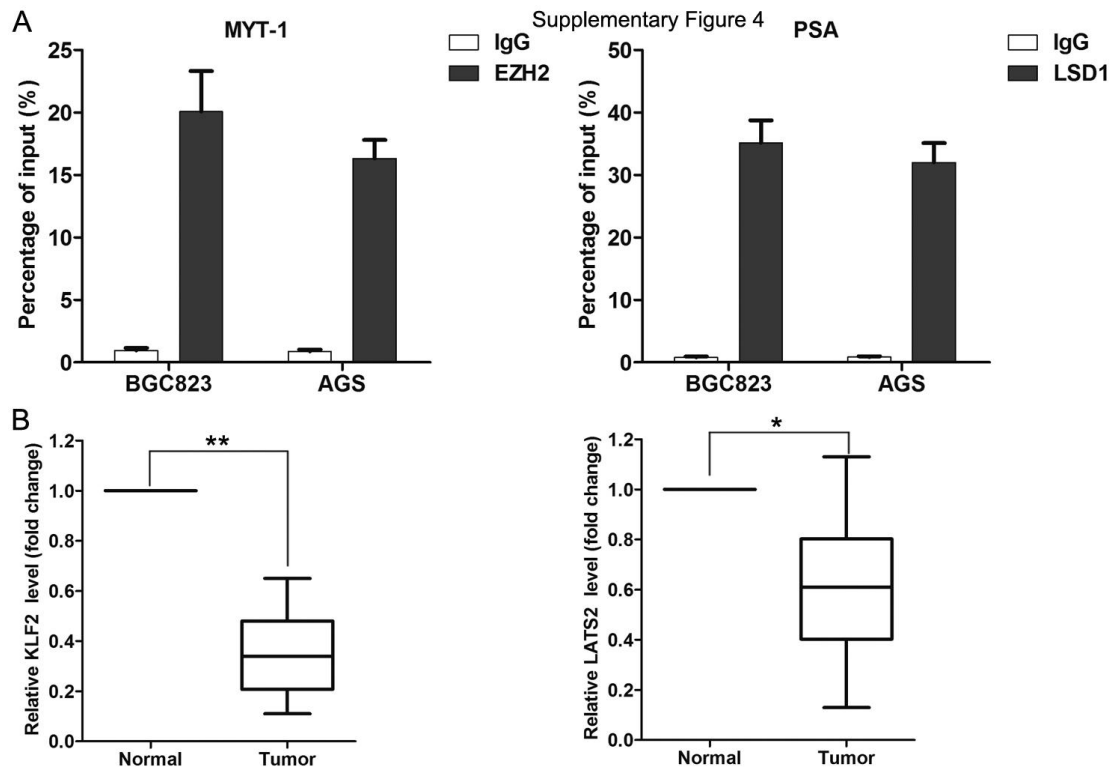

**Supplementary Figure 4. (a)** ChIP-qPCR analysis of EZH2 or LSD1 occupancy in the MYT-1 and PSA promoters in BGC823 and AGS cells, with IgG used as the negative control. **(b)** qRT-PCR analysis of KLF2 and LATS2 expression in 20 paired GC tumor tissues and their adjacent non-tumor tissues. The mean values and standard errors were calculated from triplicates of a representative experiment. \* $P < 0.05$ , \*\* $P < 0.01$ .
